# Supplementary material
Source: PubMed Central journal article supplement (PMC10991977)

# Supplementary Figure 1

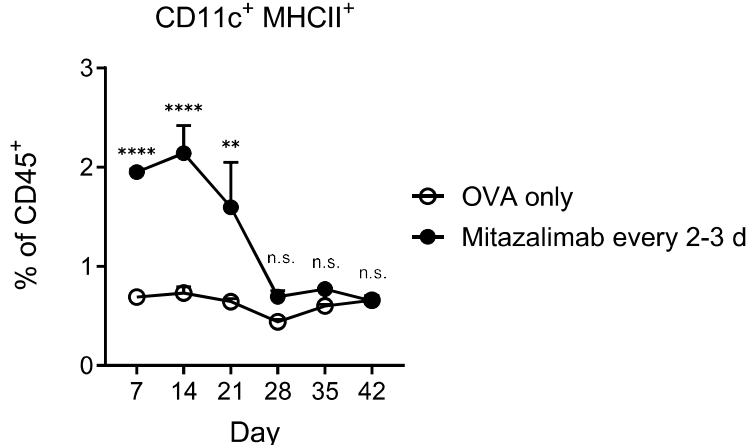

# Supplementary Figure 2

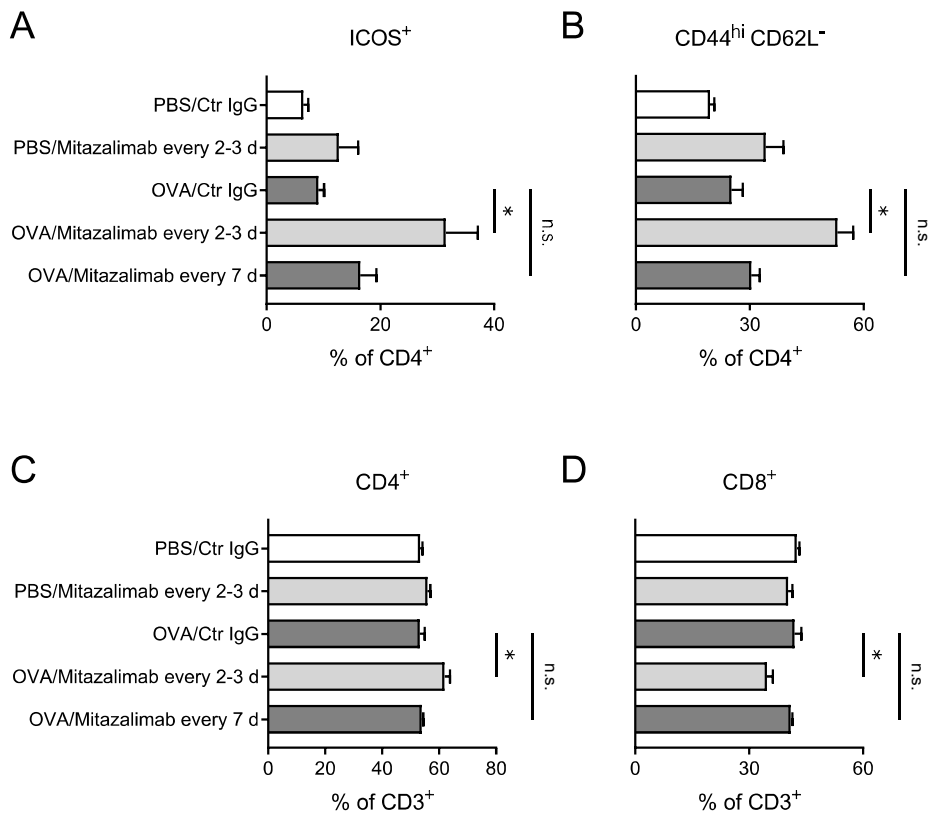

# Supplementary Figure 3

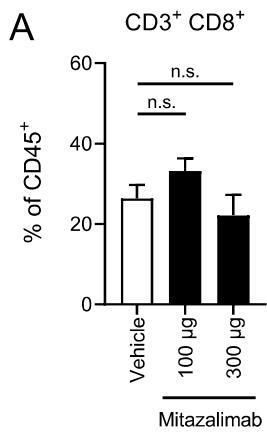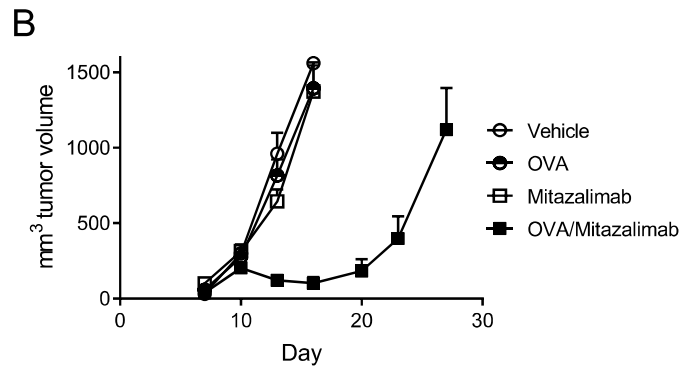

Supplement: 262_2021_2932_MOESM1_ESM.pdf [file 262_2021_2932_MOESM1_ESM.pdf]
